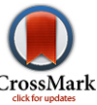

## Correction

# Correction: “Going with the Flow” or Not: Evidence of Positive Rheotaxis in Oceanic Juvenile Loggerhead Turtles (*Caretta caretta*) in the South Pacific Ocean Using Satellite Tags and Ocean Circulation Data

## The PLOS ONE Staff

There is a missing funder in the Funding section. Please refer to the complete funding statement here:

We thank Karen Frutchev and Raymond Clarke of the Pacific Islands Regional Office, National Marine Fisheries Service (NMFS) and National Oceanic and Atmospheric Administration (NOAA) who provided key funding towards this project. The funders were base funding and add-on funding from the United States government to NOAA and had no role in study design, data collection and analysis, decision to publish, or preparation of the manuscript.

## Reference

1. Kobayashi DR, Farman R, Polovina JJ, Parker DM, Rice M, et al. (2014) “Going with the Flow” or Not: Evidence of Positive Rheotaxis in Oceanic Juvenile Loggerhead Turtles (*Caretta caretta*) in the South Pacific Ocean Using Satellite Tags and Ocean Circulation Data. PLoS ONE 9(8): e103701. doi:10.1371/journal.pone.0103701

**Citation:** The PLOS ONE Staff (2014) Correction: “Going with the Flow” or Not: Evidence of Positive Rheotaxis in Oceanic Juvenile Loggerhead Turtles (*Caretta caretta*) in the South Pacific Ocean Using Satellite Tags and Ocean Circulation Data. PLoS ONE 9(10): e111358. doi:10.1371/journal.pone.0111358

**Published:** October 13, 2014

**Copyright:** © 2014 The PLOS ONE Staff. This is an open-access article distributed under the terms of the Creative Commons Attribution License, which permits unrestricted use, distribution, and reproduction in any medium, provided the original author and source are credited.
